# Supplementary material
Source: PubMed Central journal article supplement (PMC4288263)

Scan number 18749 Raw file Tiffy\_20100622\_MSU\_NGF\_IP2\_01  
 Method ITMS; CID Genenames Myl6b;Myl6

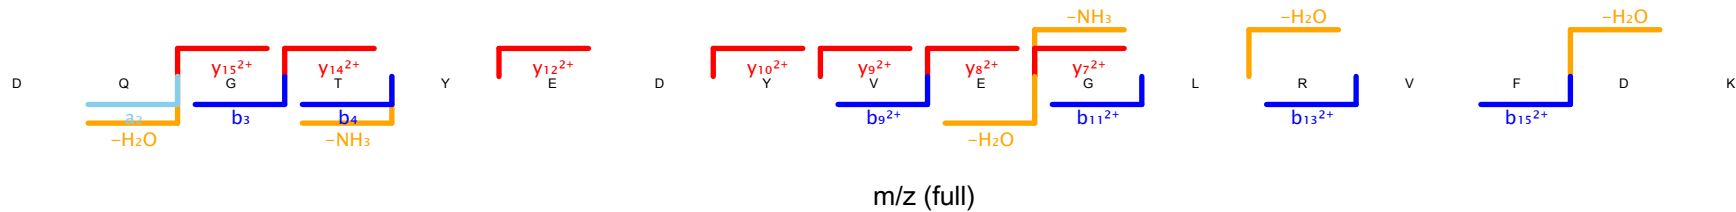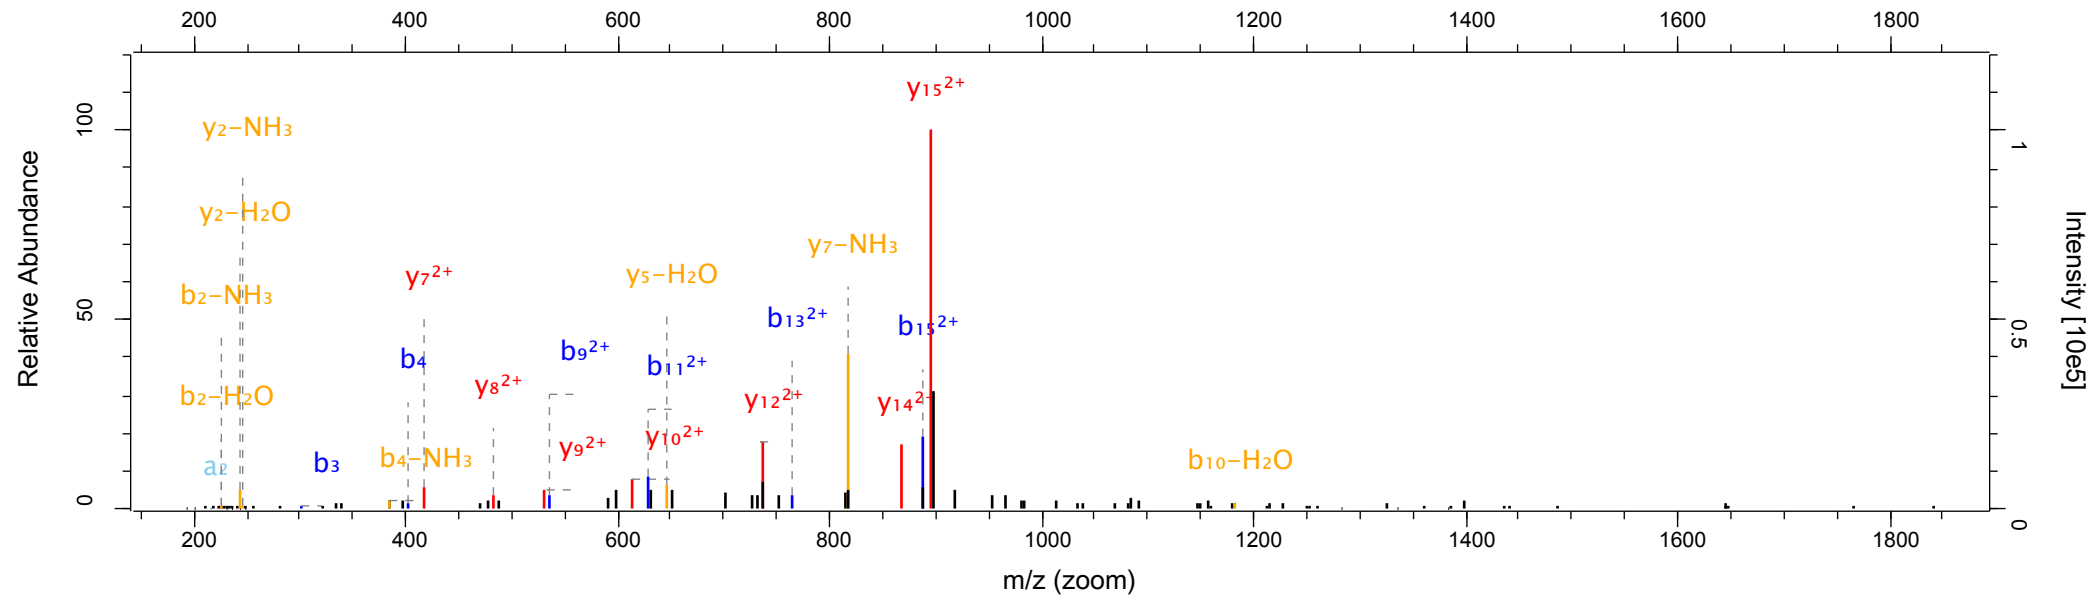

Scan number 6131 Raw file Ernie\_20100316\_MSU\_PC12\_JNK\_IP02  
 Method ITMS; CID Genenames LOC684681

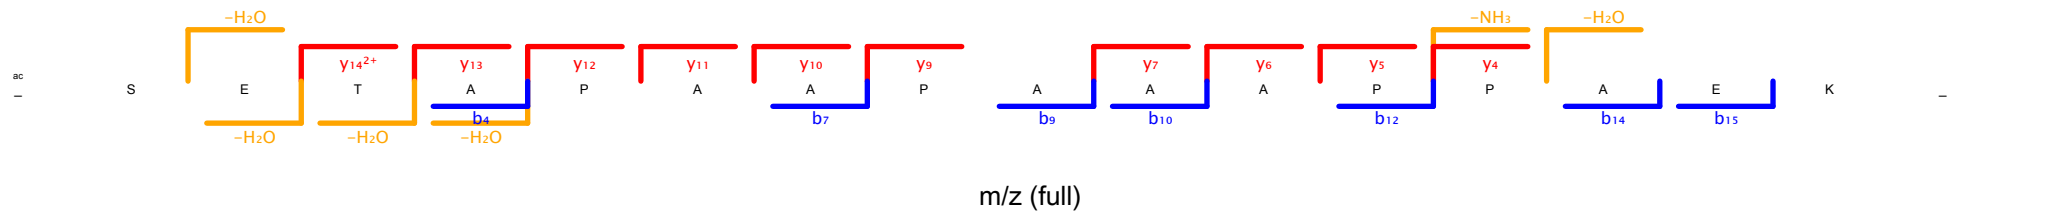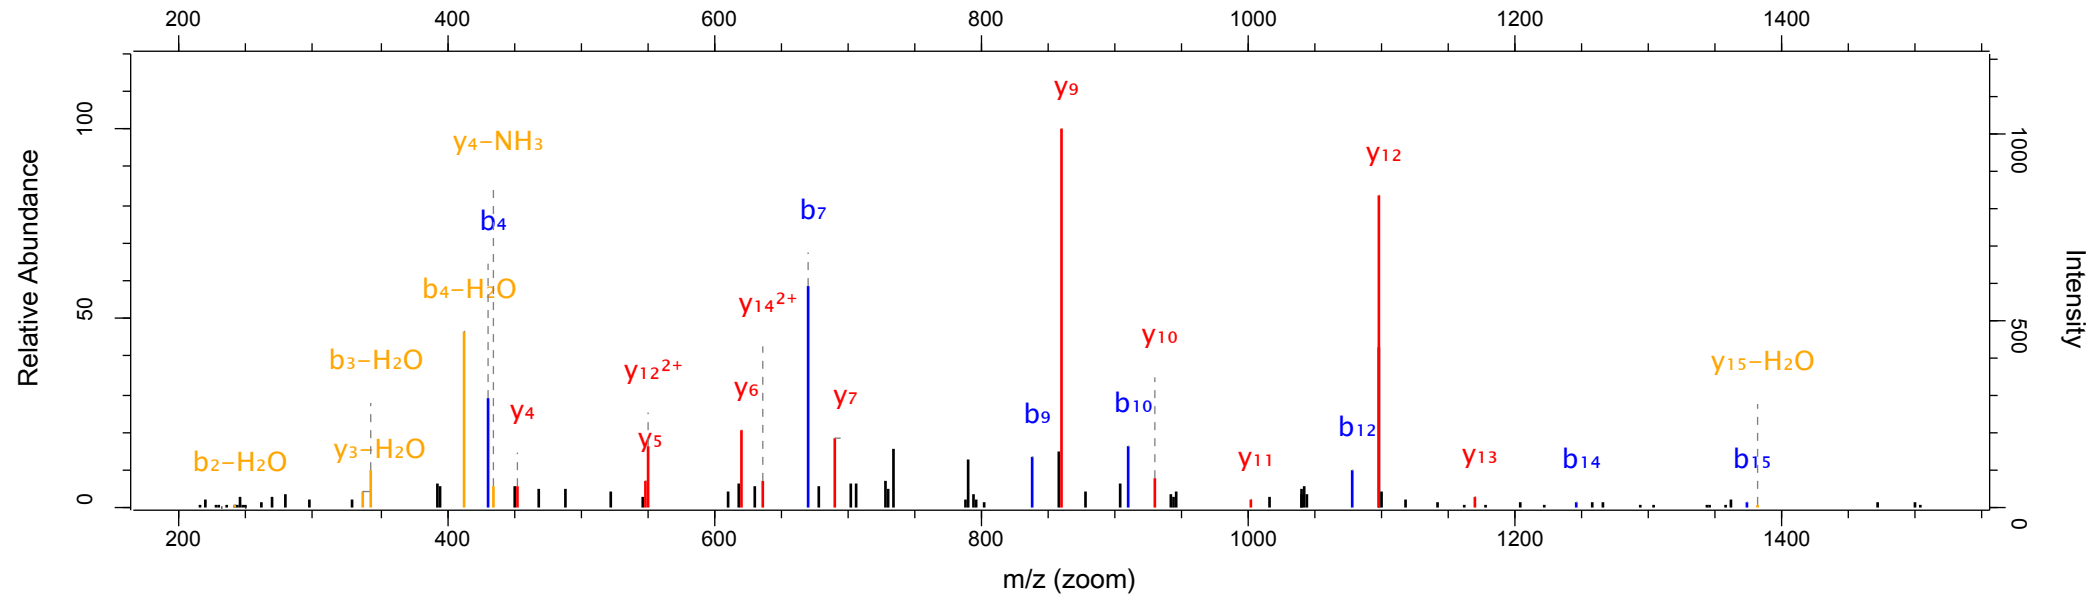

Scan number 16573 Raw file Tiffy\_20100622\_MSU\_NGF\_IP1\_01  
 Method ITMS; CID Genenames Sptan1

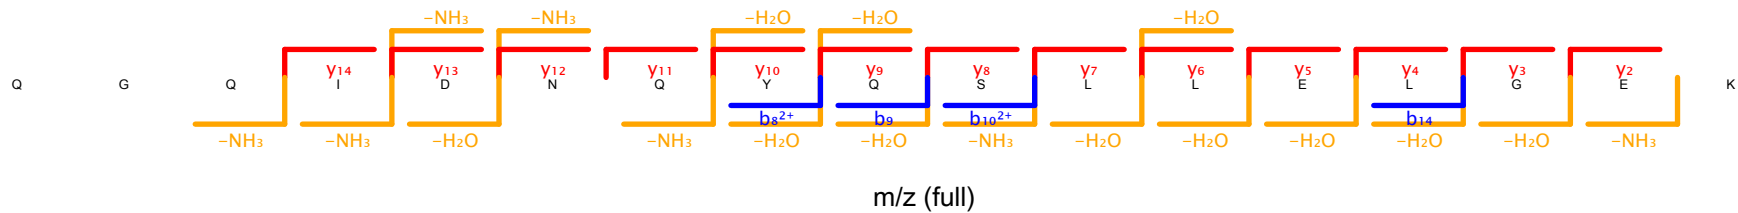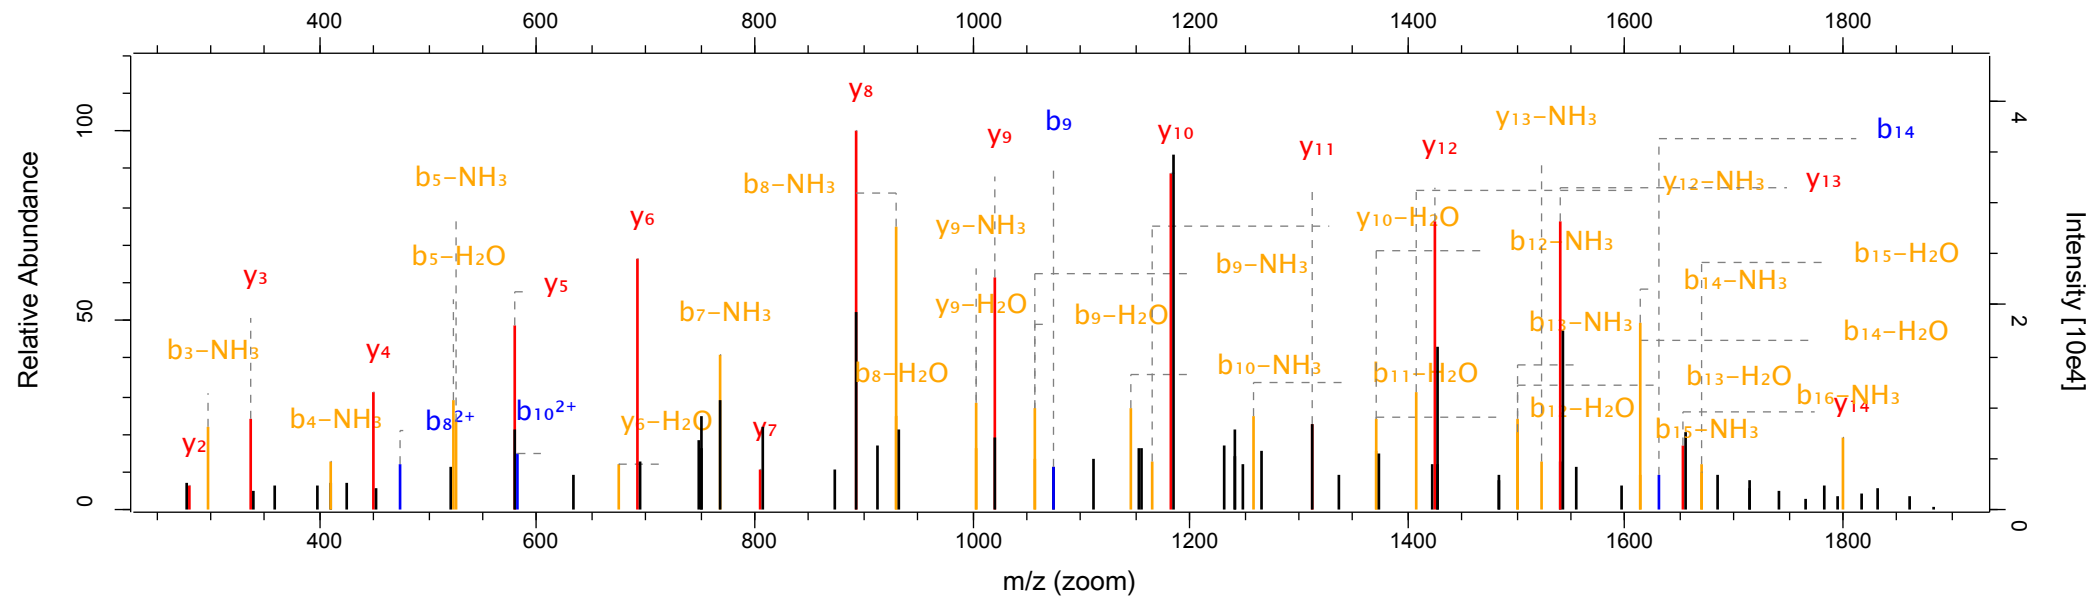

Scan number 8624 Raw file Bert\_20100512\_MSU\_NGftimecourse01  
 Method ITMS; CID Genenames Sumo2

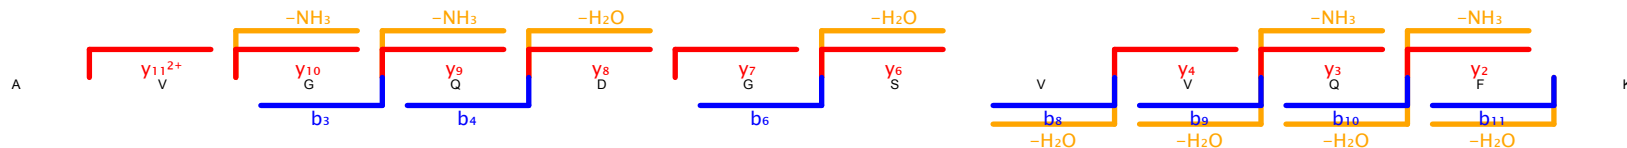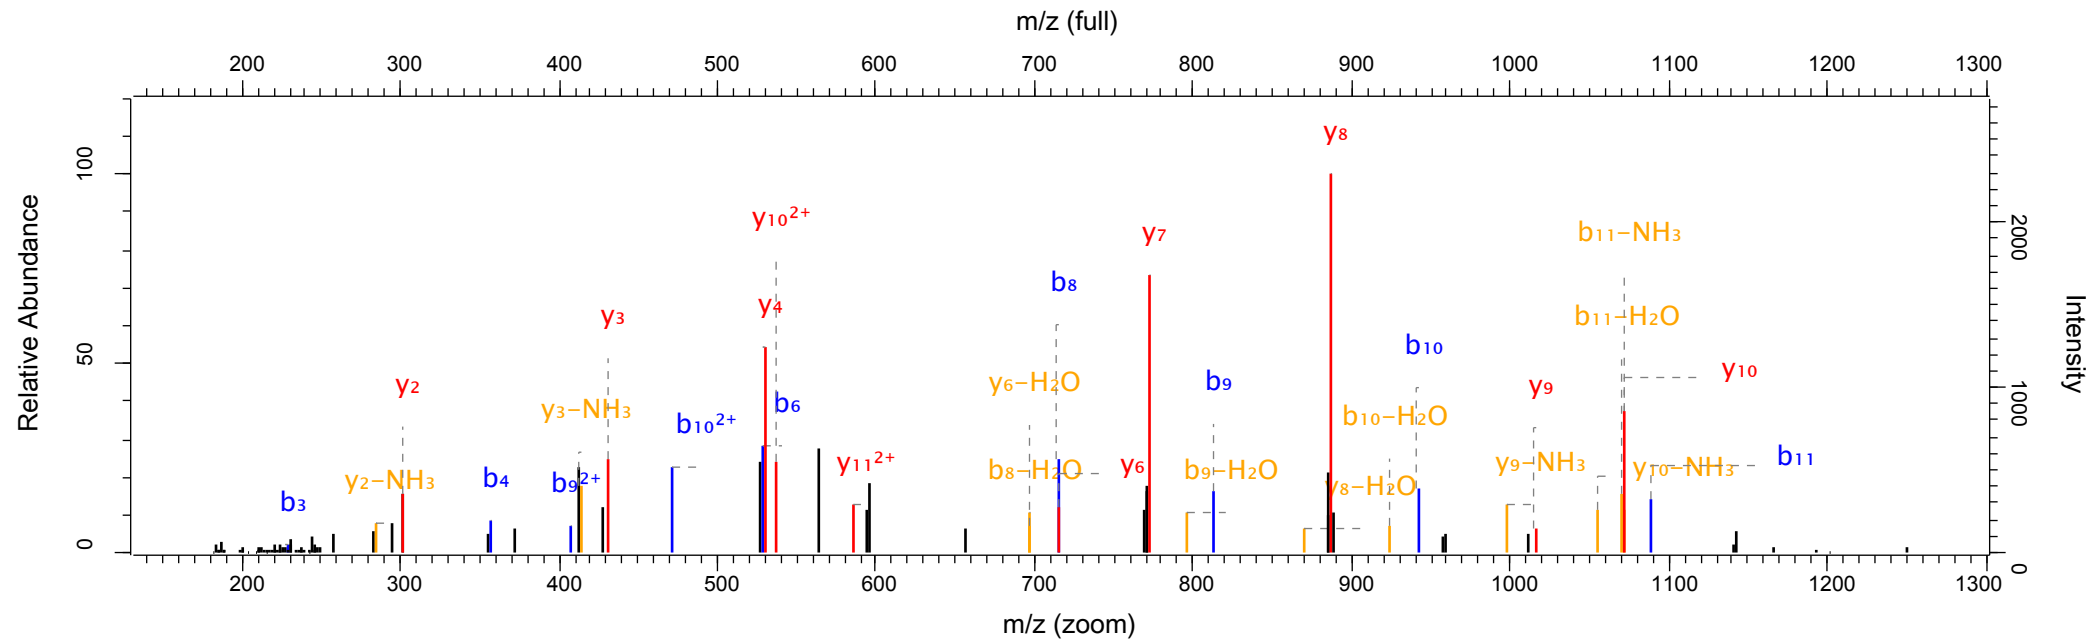

Scan number 32860 Raw file Ernie\_20100316\_MSU\_PC12\_JNK\_IP01  
 Method ITMS; CID Genenames Gna14

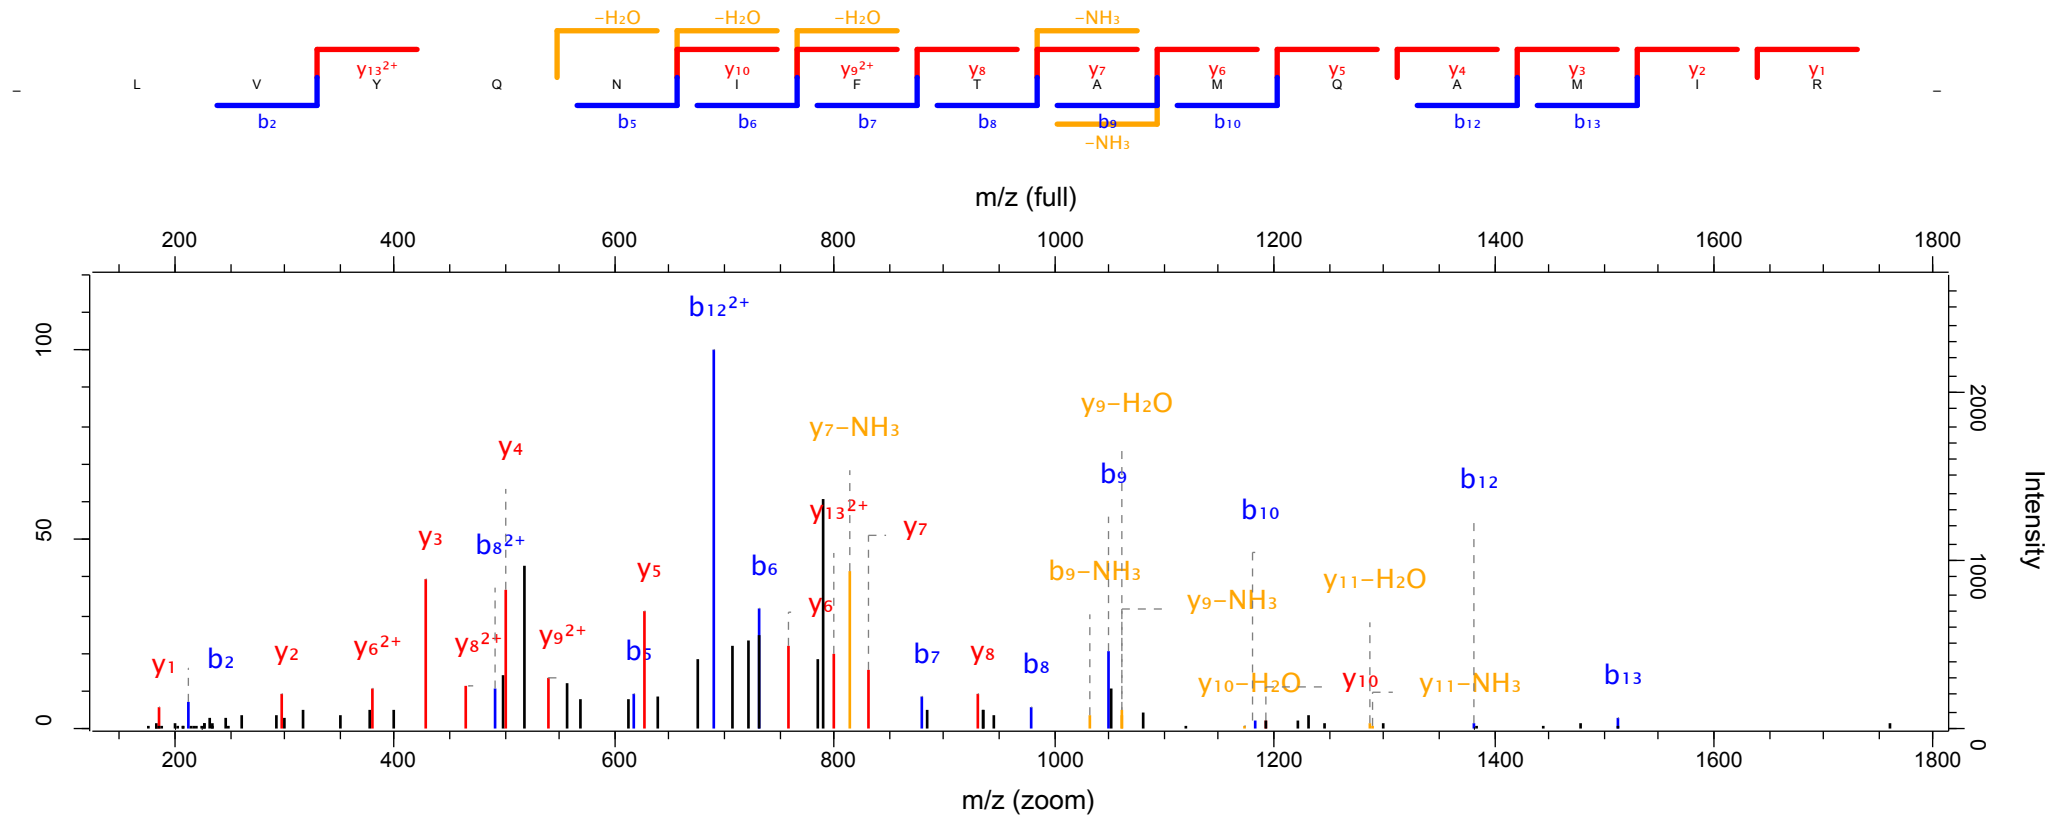

Scan number 25604 Raw file Ernie\_20100316\_MSU\_PC12\_JNK\_IP01  
 Method ITMS; CID Pepti... 215.98

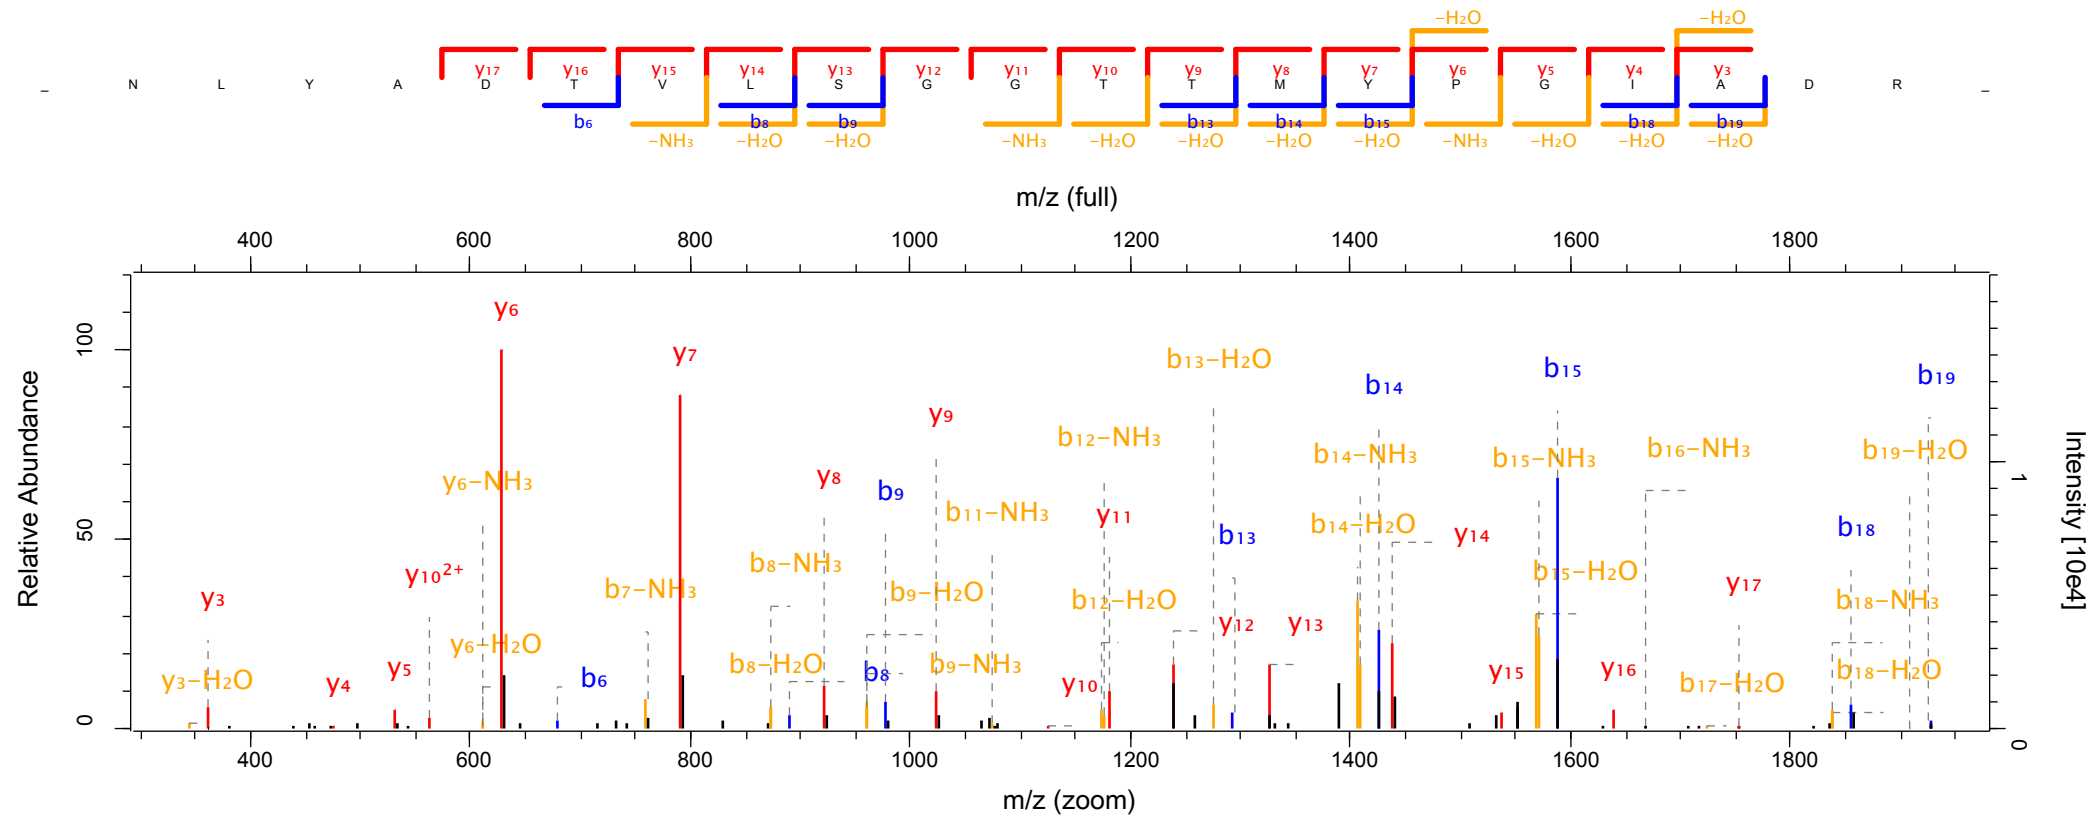

|             |           |           |                               |
|-------------|-----------|-----------|-------------------------------|
| Scan number | 3740      | Raw file  | Tiffy_20100622_MSU_NGF_IP2_01 |
| Method      | ITMS; CID | Genenames | Prph                          |

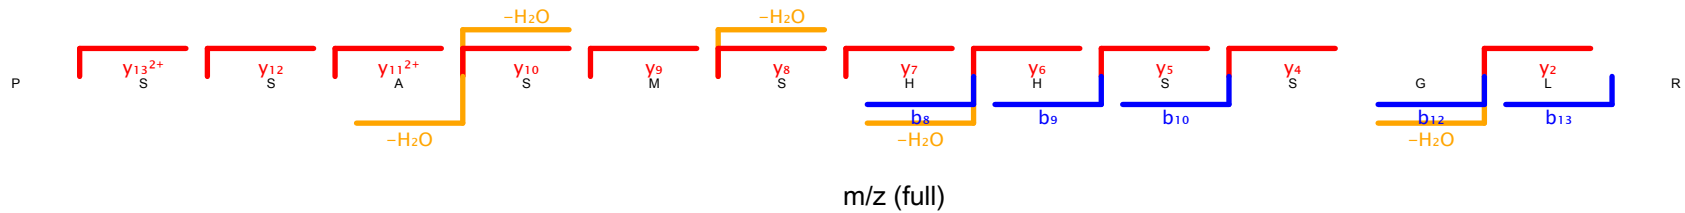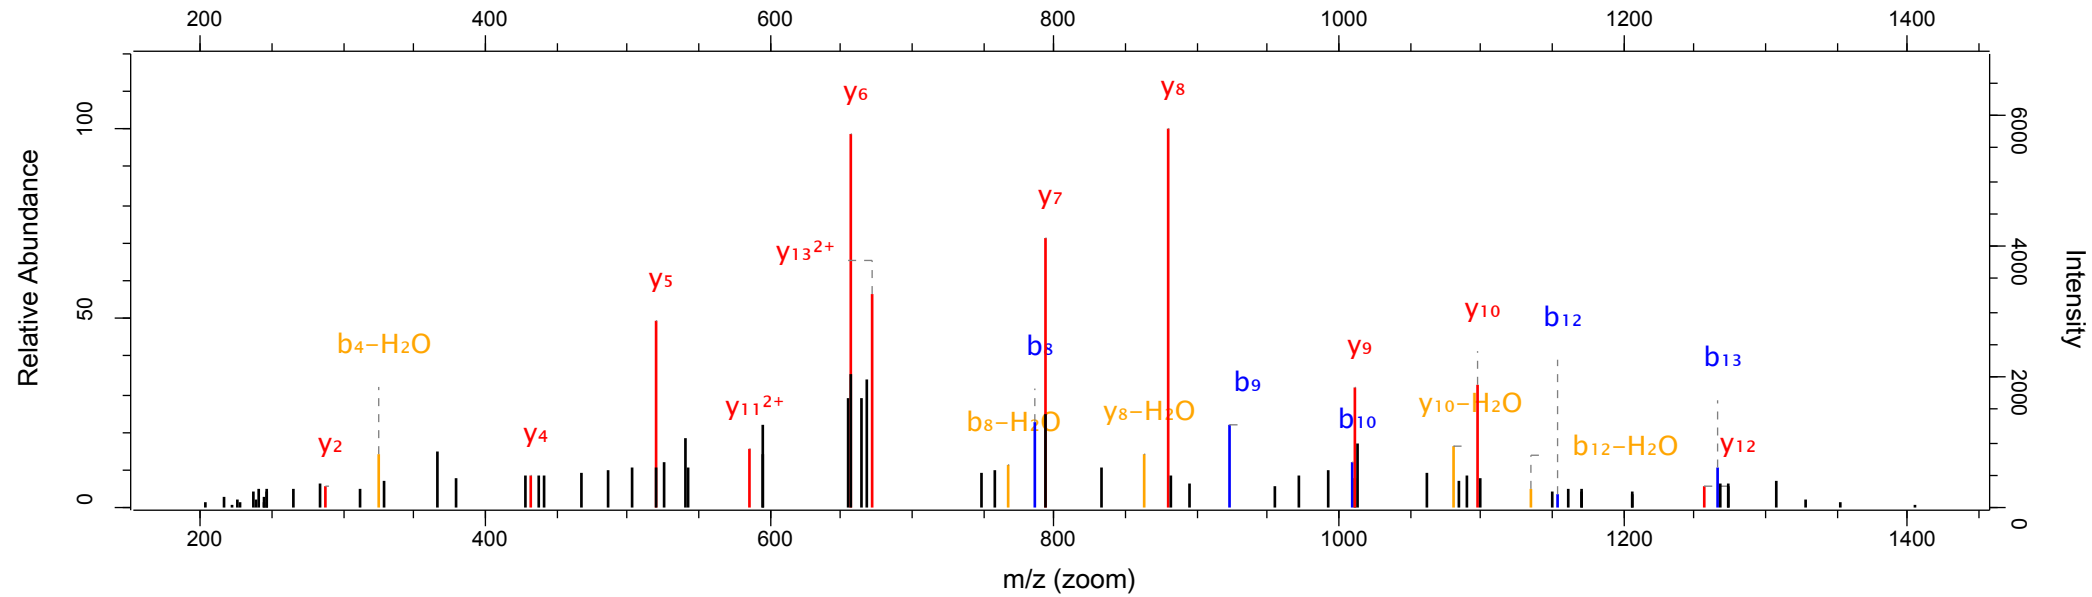

Scan number 3236 Raw file Bert\_20100512\_MSU\_NGTimecourse02  
Method ITMS; CID Genenames LOC298795

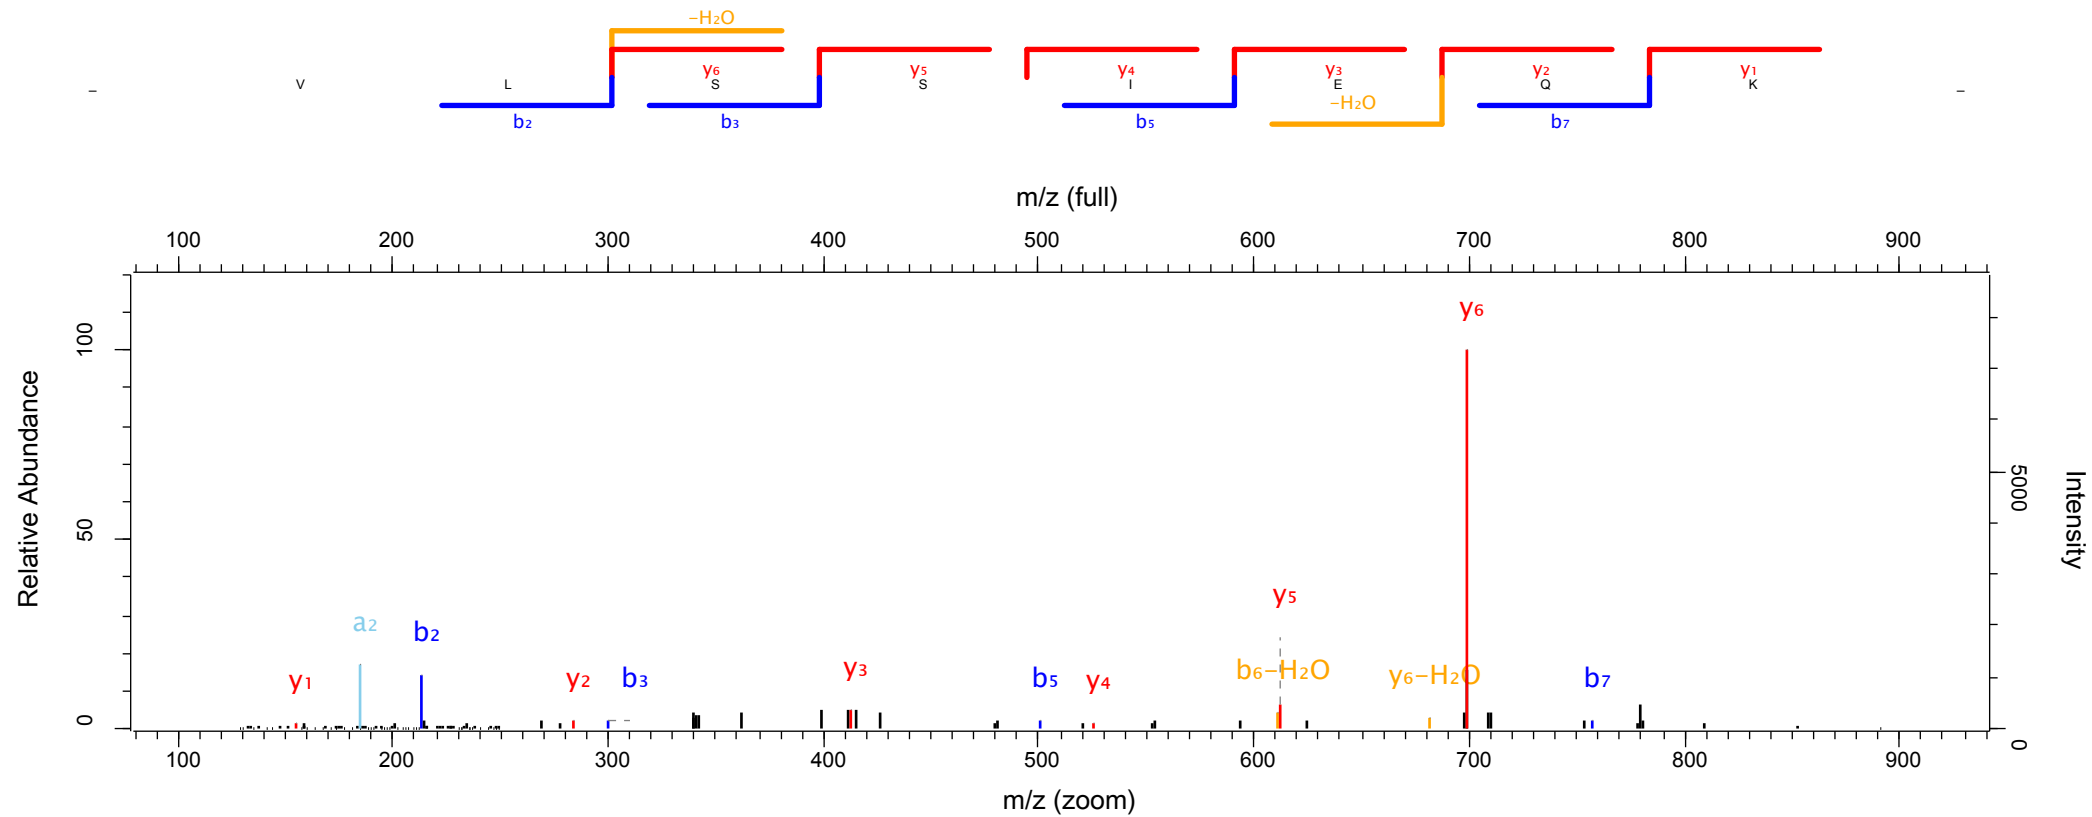



|             |           |           |                               |
|-------------|-----------|-----------|-------------------------------|
| Scan number | 16535     | Raw file  | Tiffy_20100622_MSU_NGF_IP3_02 |
| Method      | ITMS; CID | Genenames | Rplp2                         |

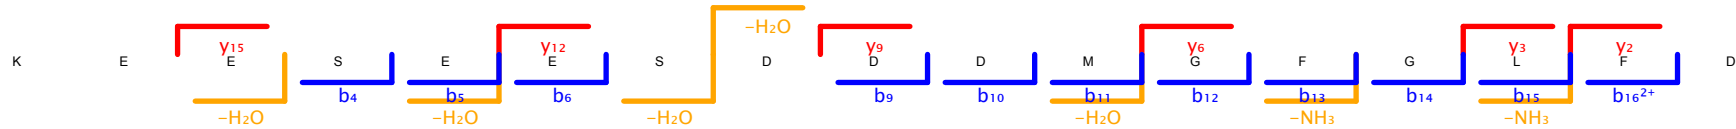

m/z (full)

400 600 800 1000 1200 1400 1600 1800

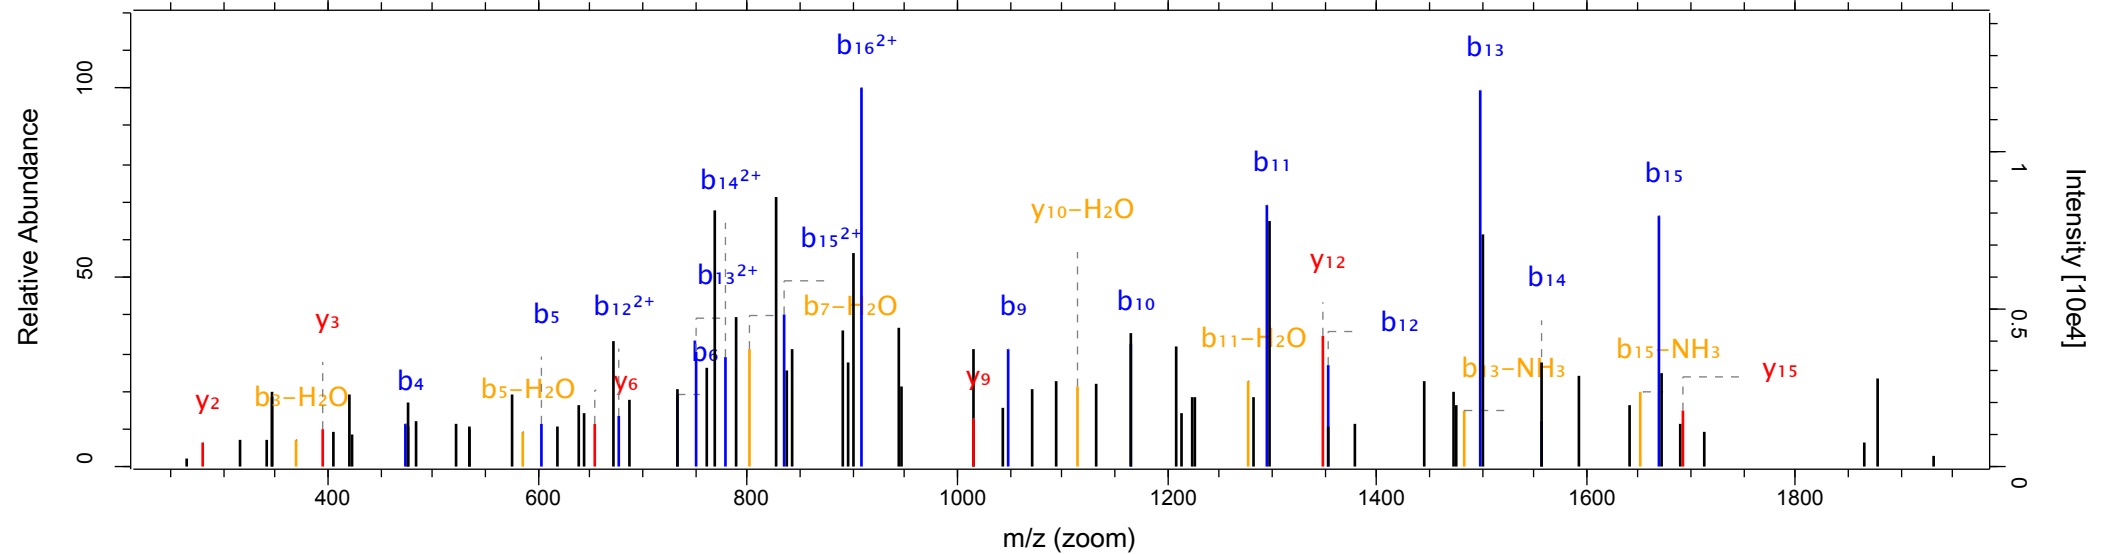

Scan number 17601 Raw file Ernie\_20100316\_MSU\_PC12\_JNK\_IP01  
Method ITMS; CID Genenames Myl3;Myl6b;Myl6

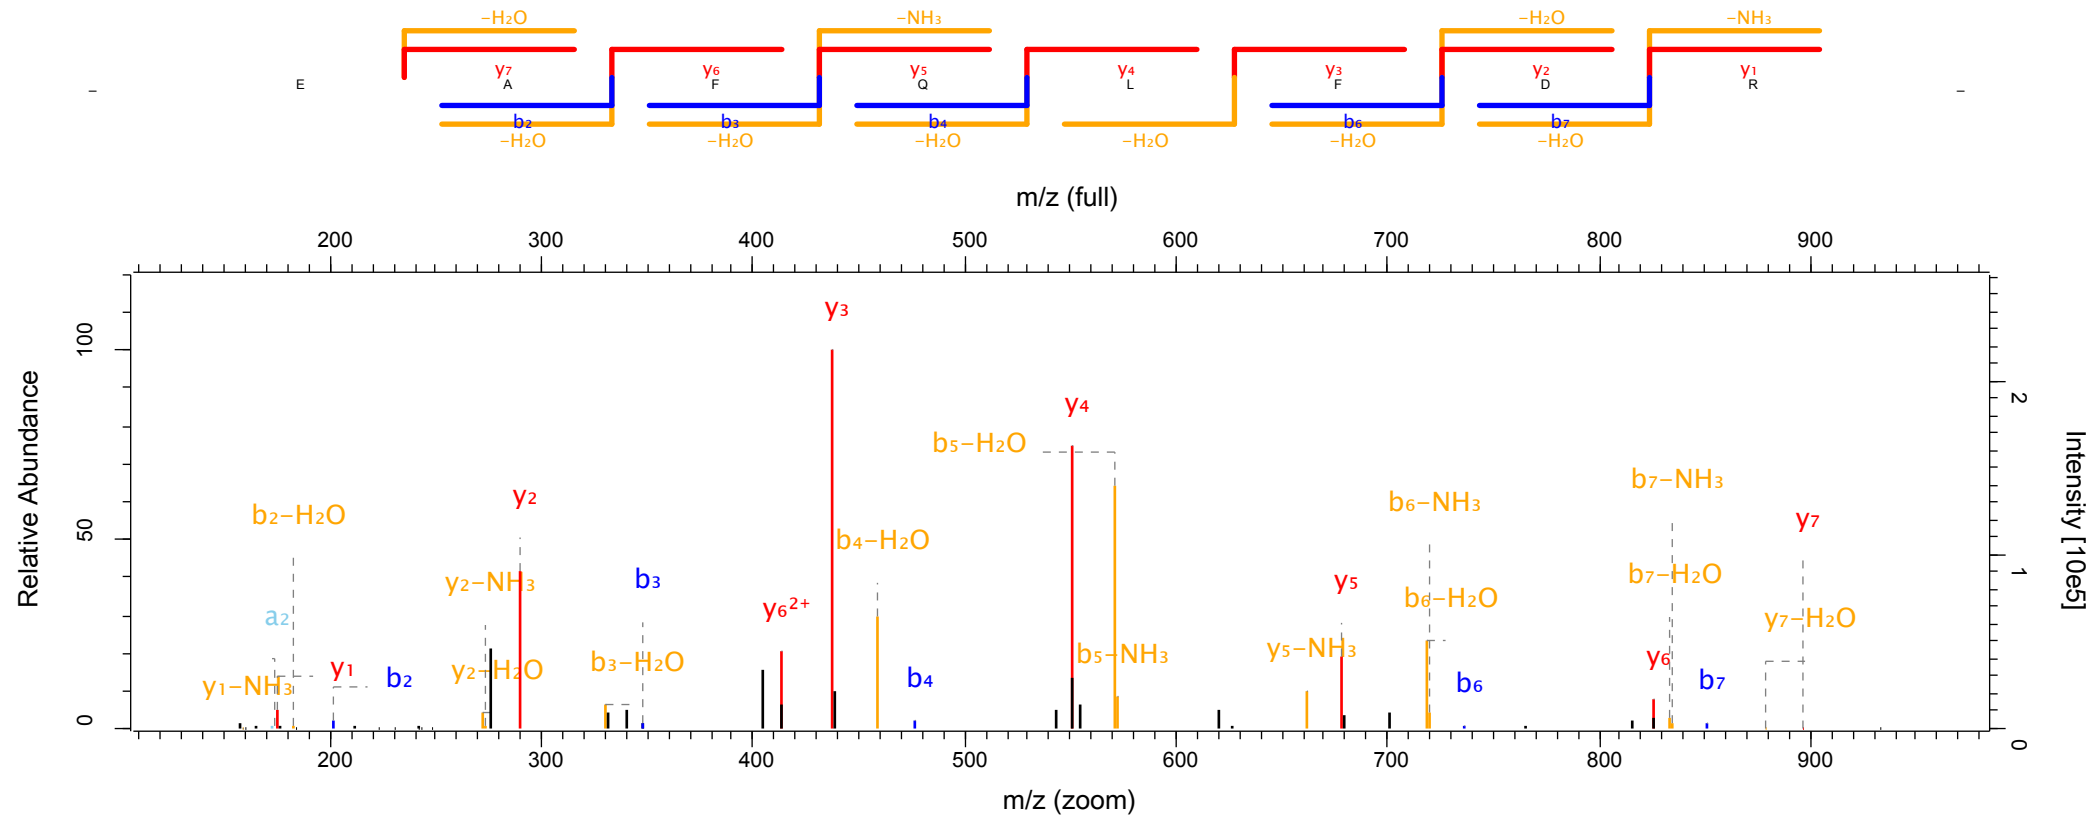

Scan number 32484 Raw file Bert\_20100512\_MSU\_NGFtimecourse01  
 Method ITMS; CID Genenames S100a1

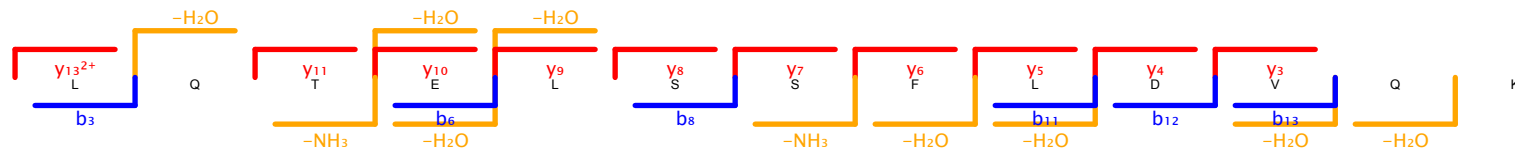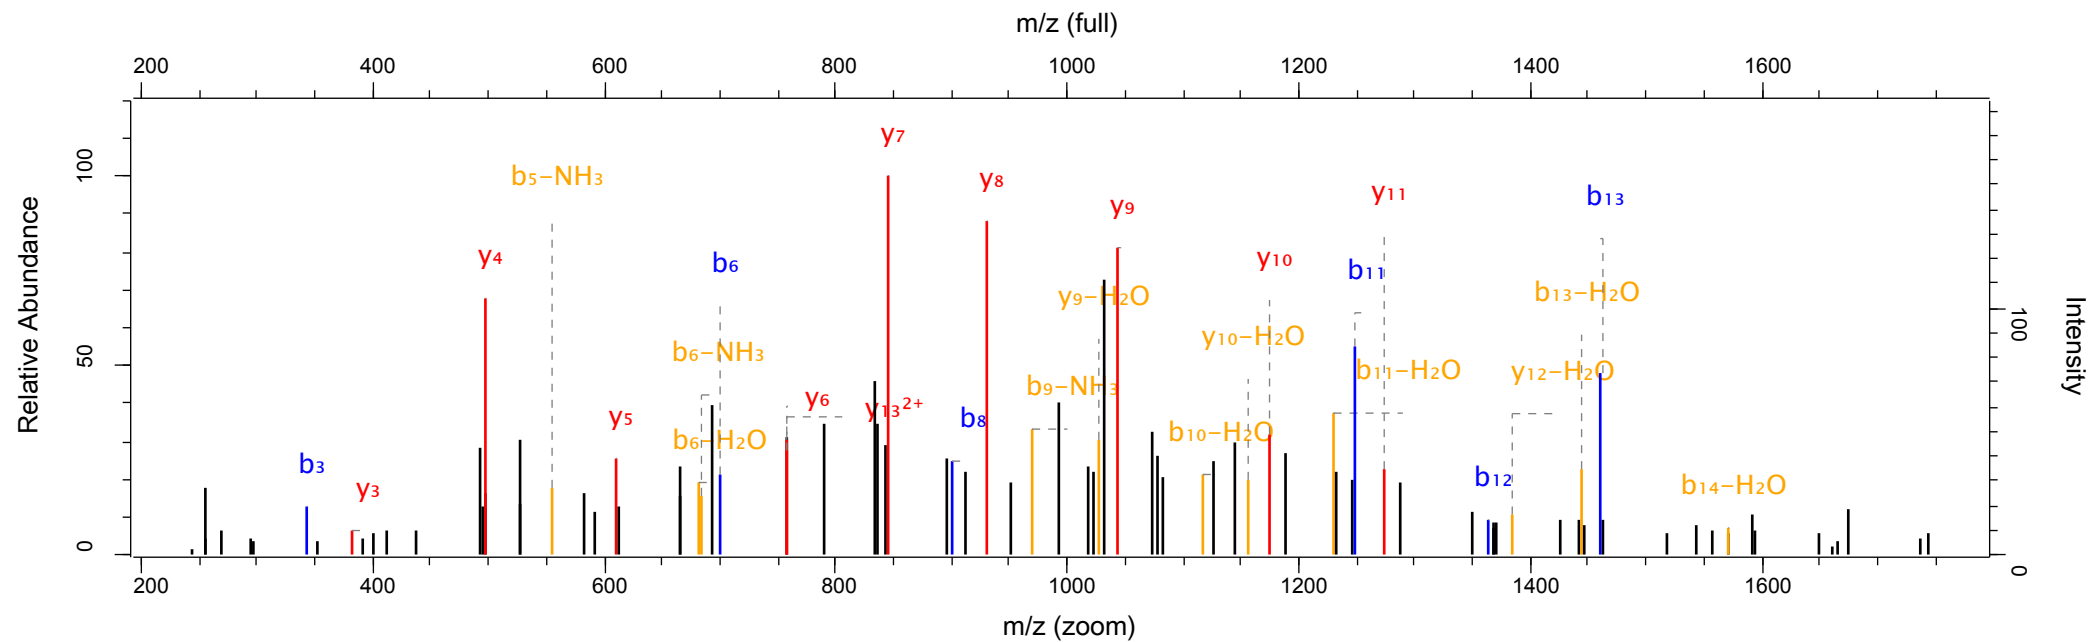

Scan number 3414 Raw file Bert\_20100512\_MSU\_NGfimecourse02  
 Method ITMS; CID Genenames Tkt

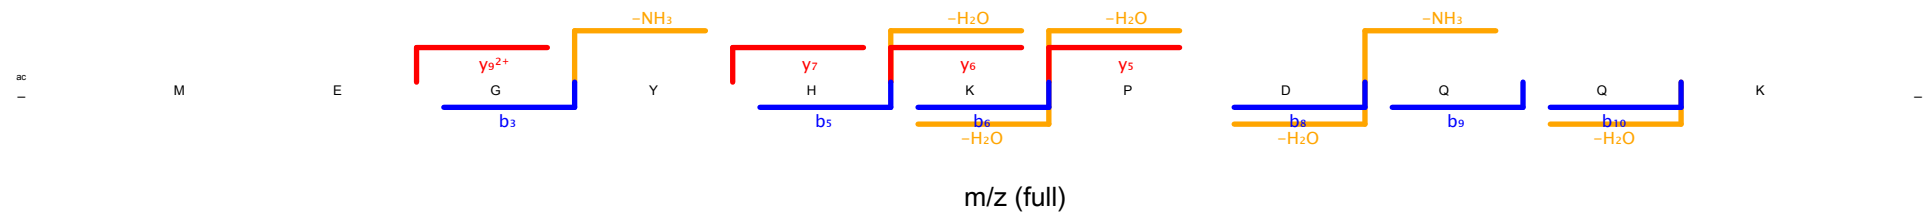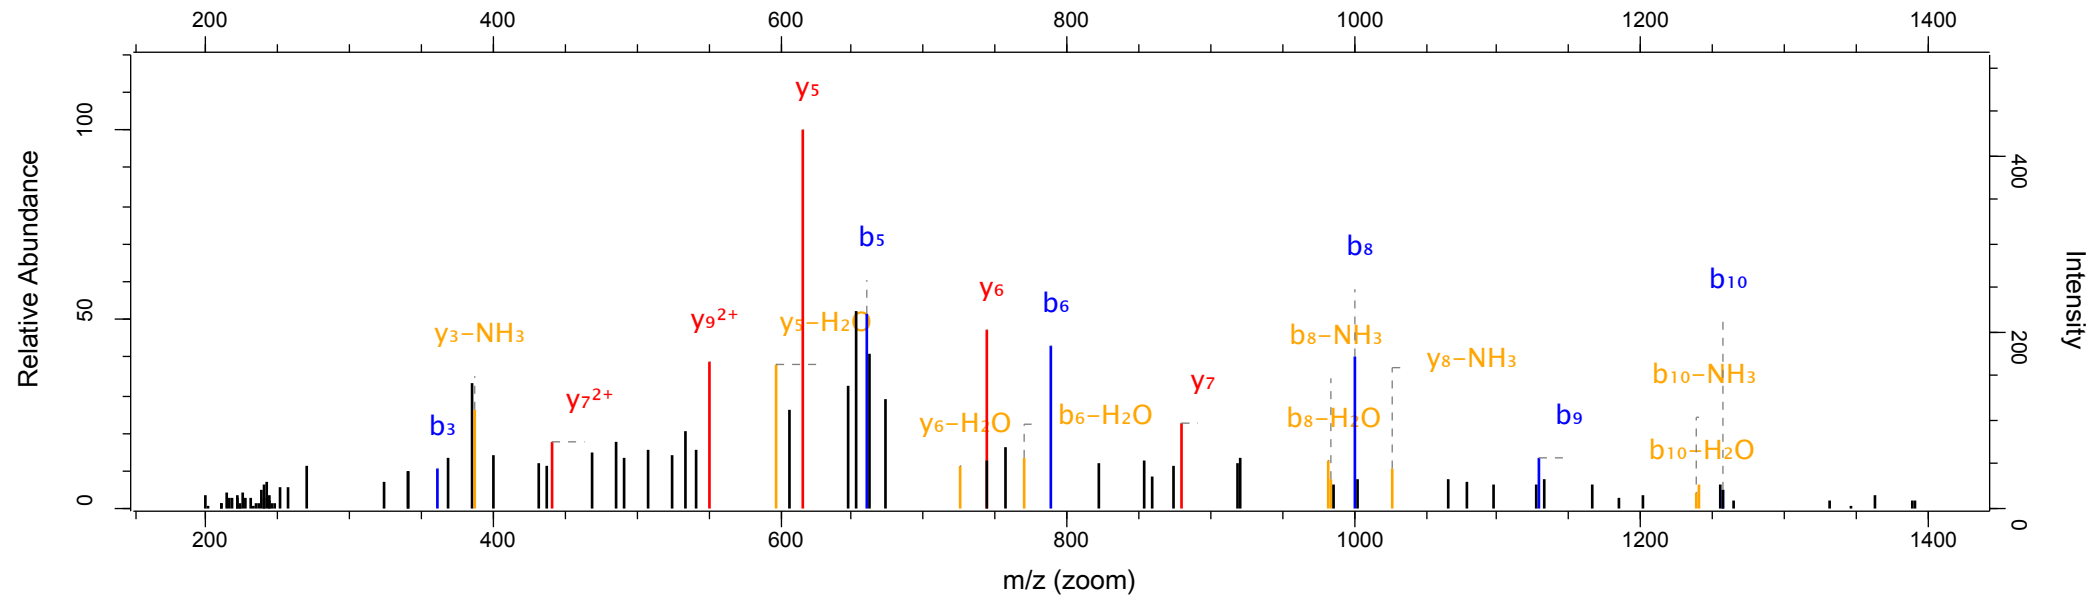

Scan number 16728 Raw file Tiffy\_20100622\_MSU\_NGF\_IP2\_01  
 Method ITMS; CID Genenames Atp6v0c

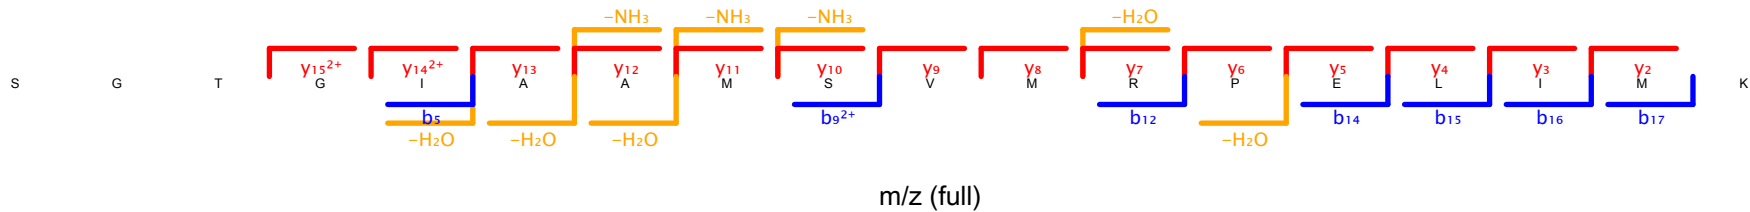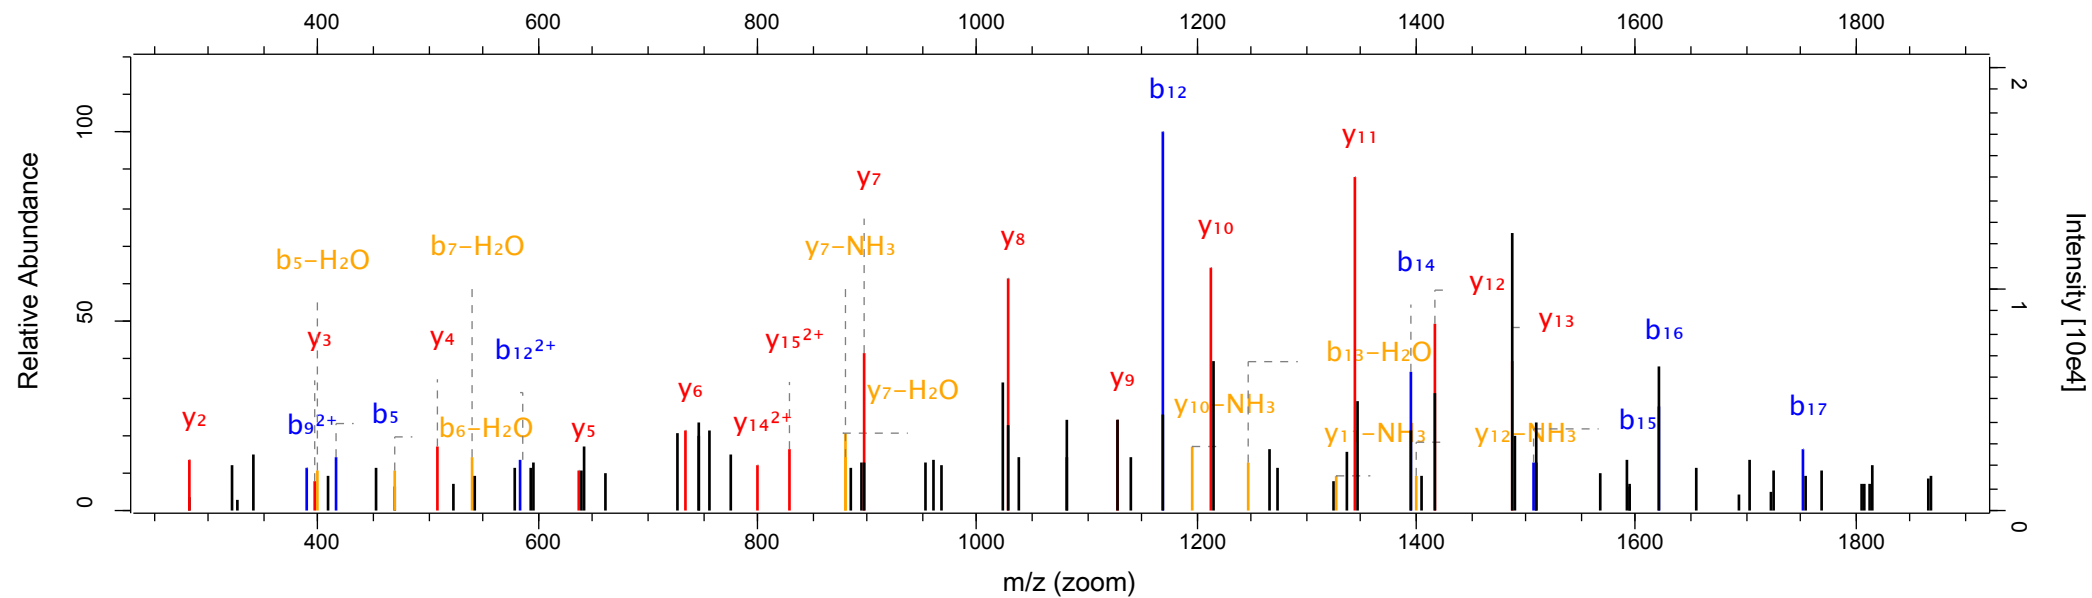

Scan number 20116 Raw file Ernie\_20100316\_MSU\_PC12\_JNK\_IP02  
 Method ITMS; CID Genenames Actc1;Acta1;Acta2;Actg2

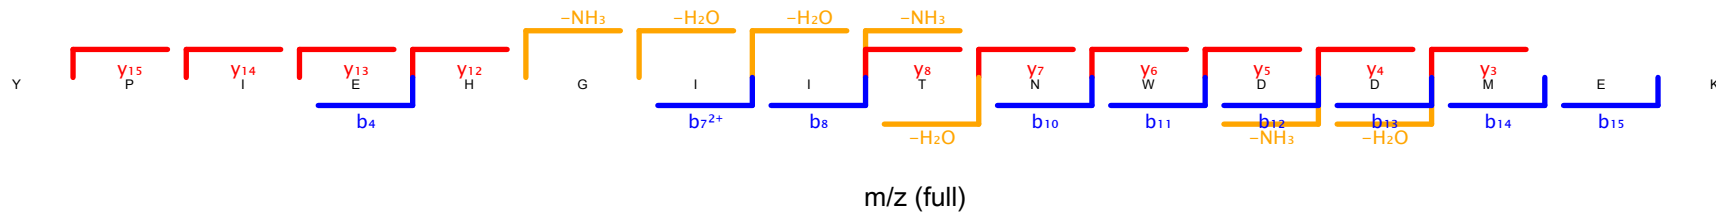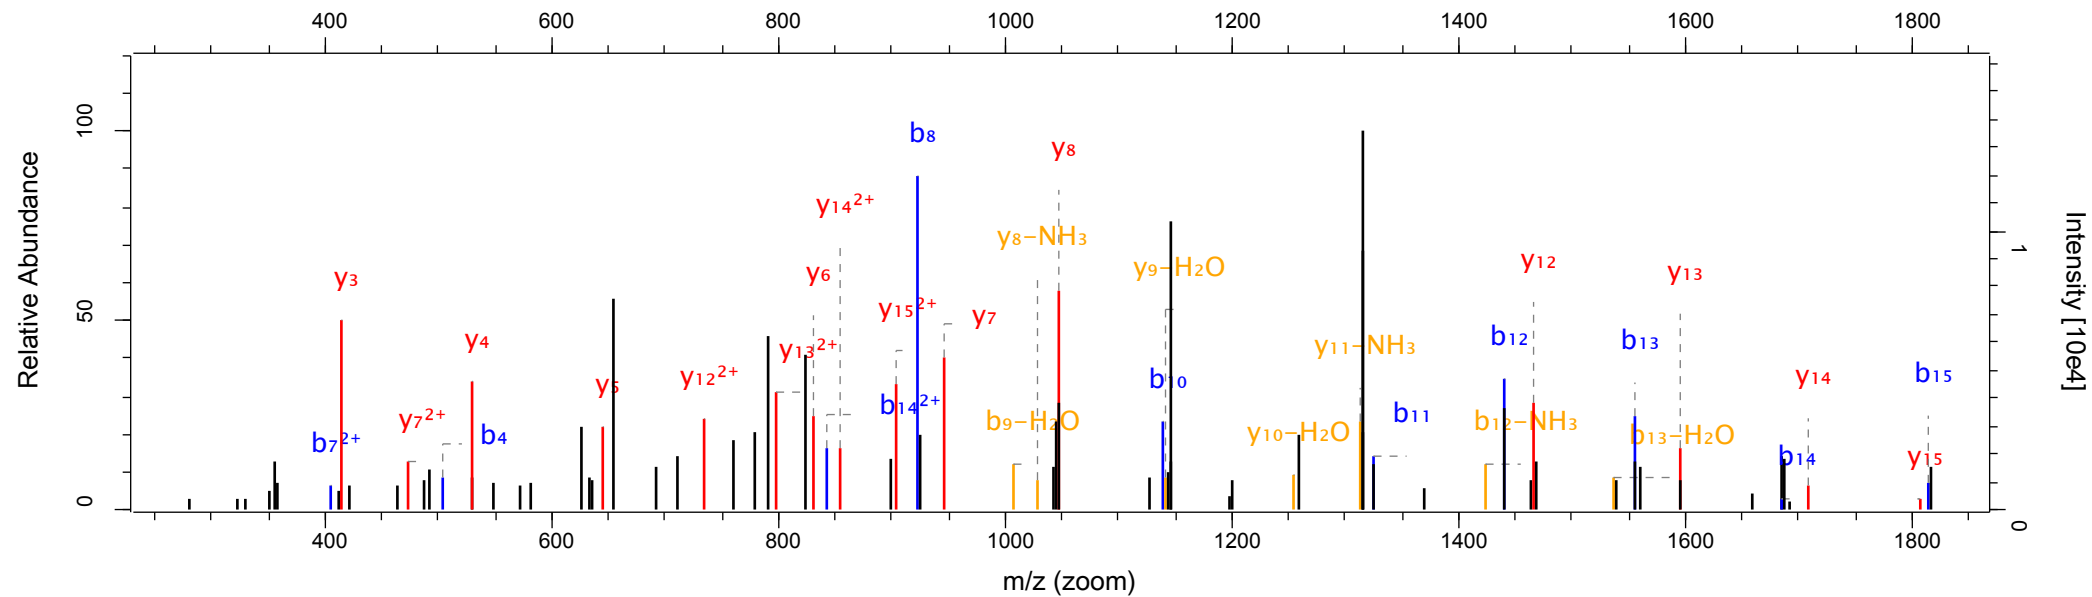



Scan number 6378 Raw file Bert\_20100512\_MSU\_NGfimecourse03  
 Method ITMS; CID Genenames Aldh9a1

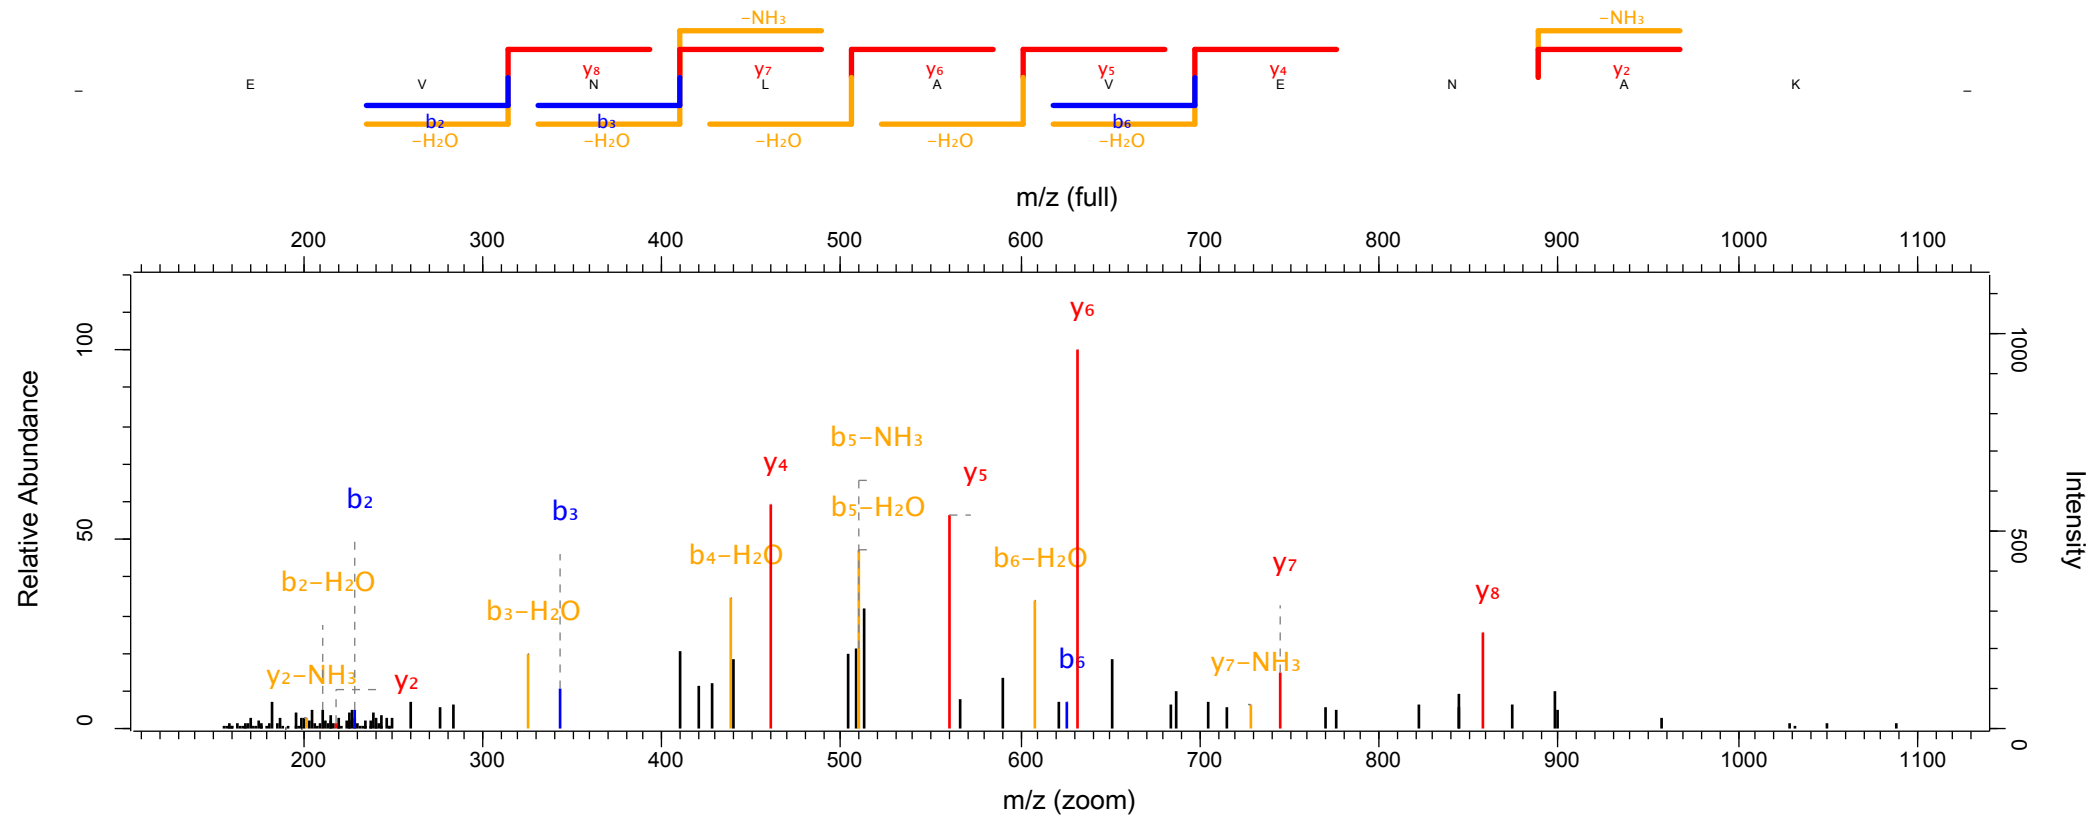

Supplement: supp_M114.039370_mcp.M114.039370-4.pdf [file supp_M114.039370_mcp.M114.039370-4.pdf]
