# Supplementary material
Source: PubMed Central journal article supplement (PMC4288263)

Figure S1

A

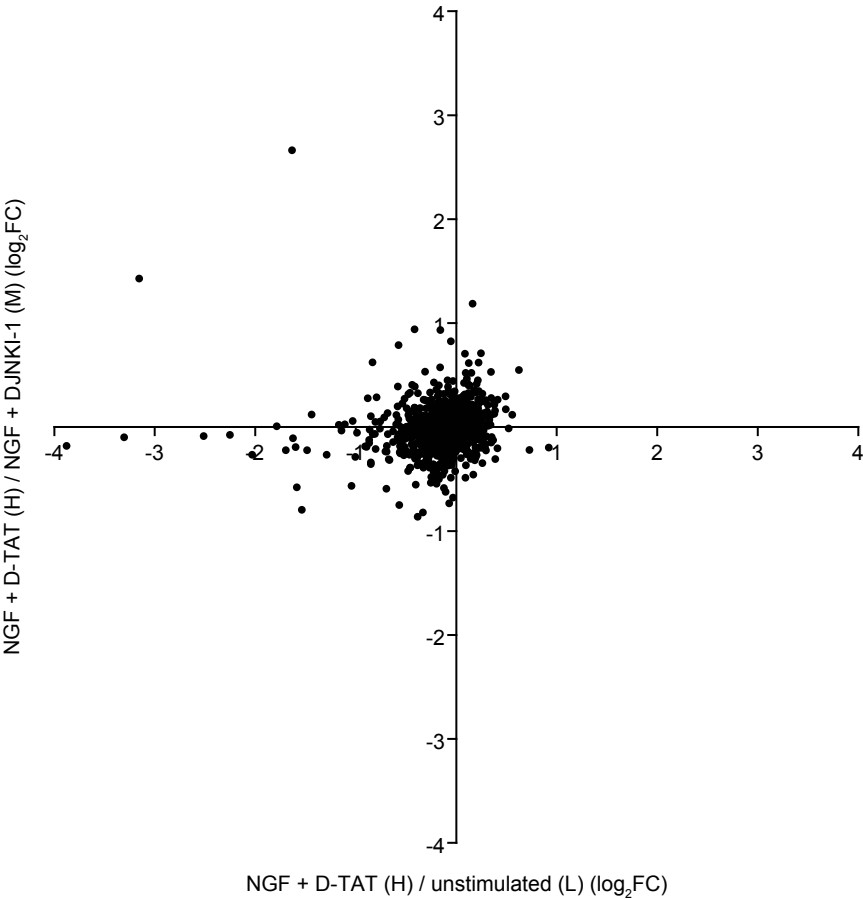

B

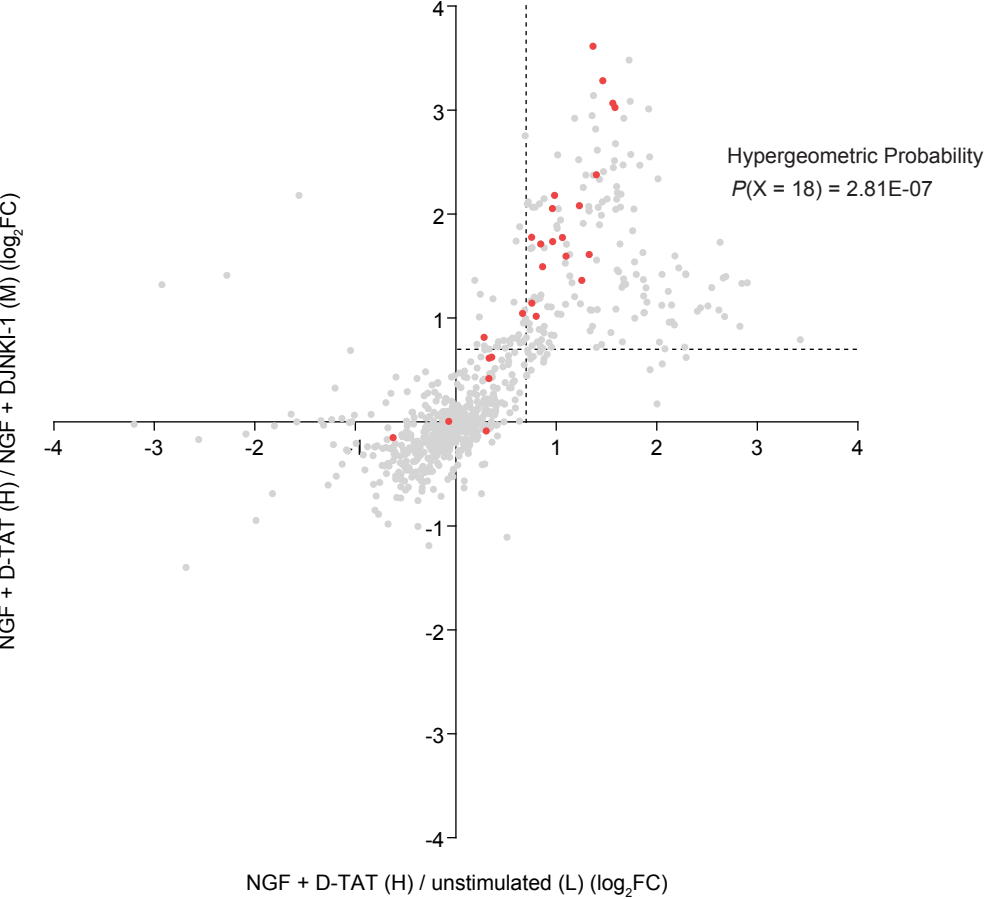

Supplement: supp_M114.039370_mcp.M114.039370-1.pdf [file supp_M114.039370_mcp.M114.039370-1.pdf]
